# Supplementary material for: Sn(IV)-free tin perovskite films realized by in situ Sn(0) nanoparticle treatment of the precursor solution
Source: PubMed Central journal article supplement (PMC7297727; doi:10.1038/s41467-020-16726-3), 2020-06-16
Supplement: 41467_2020_16726_MOESM3_ESM.pdf [file 41467_2020_16726_MOESM3_ESM.pdf]

## Solar Cells Reporting Summary

Nature Research wishes to improve the reproducibility of the work that we publish. This form is intended for publication with all accepted papers reporting the characterization of photovoltaic devices and provides structure for consistency and transparency in reporting. Some list items might not apply to an individual manuscript, but all fields must be completed for clarity.

For further information on Nature Research policies, including our [data availability policy](#), see [Authors & Referees](#).

### ü Experimental design

**Please check: are the following details reported in the manuscript?**

#### 1. Dimensions

- Area of the tested solar cells  Yes  No
- Method used to determine the device area  Yes  No

#### 2. Current-voltage characterization

- Current density-voltage (J-V) plots in both forward and backward direction  Yes  No
- Voltage scan conditions  Yes  No   
*For instance: scan direction, speed, dwell times*
- Test environment  Yes  No   
*For instance: characterization temperature, in air or in glove box*
- Protocol for preconditioning of the device before its characterization  Yes  No
- Stability of the J-V characteristic  Yes  No   
*Verified with time evolution of the maximum power point or with the photocurrent at maximum power point; see [ref. 7](#) for details.*

#### 3. Hysteresis or any other unusual behaviour

- Description of the unusual behaviour observed during the characterization  Yes  No
- Related experimental data  Yes  No

#### 4. Efficiency

- External quantum efficiency (EQE) or incident photons to current efficiency (IPCE)  Yes  No
- A comparison between the integrated response under the standard reference spectrum and the response measure under the simulator  Yes  No
- For tandem solar cells, the bias illumination and bias voltage used for each subcell  Yes  No

#### 5. Calibration

- Light source and reference cell or sensor used for the characterization  Yes  No
- Confirmation that the reference cell was calibrated and certified  Yes  No

- Calculation of spectral mismatch between the reference cell and the devices under test  
 Yes  
 No The solar simulators are 3A grade
6. Mask/aperture
- Size of the mask/aperture used during testing  
 Yes Methods; Characterizations  
 No
- Variation of the measured short-circuit current density with the mask/aperture area  
 Yes They were already measured at the maximum aperture  
 No
7. Performance certification
- Identity of the independent certification laboratory that confirmed the photovoltaic performance  
 Yes Kanagawa Institute of Industrial Science and Technology (KISTEC), Japan  
 No
- A copy of any certificate(s)  
*Provide in Supplementary Information*  
 Yes Supplementary Information Figure 26  
 No
8. Statistics
- Number of solar cells tested  
 Yes Table 1 & Table 2  
 No
- Statistical analysis of the device performance  
 Yes Table 1 & Table 2  
 No
9. Long-term stability analysis
- Type of analysis, bias conditions and environmental conditions  
*For instance: illumination type, temperature, atmosphere humidity, encapsulation method, preconditioning temperature*  
 Yes Supplementary Information Figure 25  
 No
